# Supplementary material for: Effect of Dapagliflozin on 6-Minute Walk Distance in Heart Failure With Preserved Ejection Fraction: PRESERVED-HF
Source: PubMed Central journal article supplement — Circ Heart Fail. 2023 Oct 23;16(11):e010633. doi: 10.1161/CIRCHEARTFAILURE.123.010633 (PMC10655911; doi:10.1161/circheartfailure.123.010633), 2023-10-23

## SUPPLEMENTAL MATERIAL

### Supplemental Table

**Table S1. Characteristics of groups with incomplete vs. complete 6-minute walk test distance data**

Values are shown as absolute numbers (percentages and mean  $\pm$  SD or median with IQR). AF indicates atrial fibrillation; BMI, body mass index; eGFR, estimated glomerular filtration rate; IQR, interquartile range; KCCQ-OS, Kansas City Cardiomyopathy Questionnaire overall summary score; NTproBNP, N-terminal pro B-type natriuretic peptide; NYHA, New York Heart Association; SD, standard deviation; and 6MWT, 6-minute walk test.

| Characteristics                       | Incomplete vs Complete Data |                       | Total                 | P-Value |
|---------------------------------------|-----------------------------|-----------------------|-----------------------|---------|
|                                       | Incomplete<br>n = 35        | Complete<br>n = 289   | n = 324               |         |
| Female, n (%)                         | 21 (60.0)                   | 163 (56.4)            | 184 (56.8)            | 0.684   |
| Age, y                                | 71.9 $\pm$ 8.2              | 69.4 $\pm$ 10.6       | 69.6 $\pm$ 10.4       | 0.172   |
| White, n (%)                          | 21 (61.8)                   | 196 (68.8%)           | 217 (68.0)            | 0.407   |
| Dapagliflozin treatment group         | 16 (45.7)                   | 146 (50.5)            | 162 (50.0)            | 0.591   |
| Type 2 diabetes, n (%)                | 20 (57.1)                   | 161 (55.7)            | 181 (55.9)            | 0.871   |
| AF, n (%)                             |                             |                       |                       |         |
| No AF                                 | 14 (40.0)                   | 139 (48.1)            | 153 (47.2)            |         |
| Paroxysmal AF                         | 11 (31.4)                   | 78 (27.0)             | 89 (27.5)             |         |
| Persistent AF                         | 10 (28.6)                   | 72 (24.9)             | 82 (25.3)             | 0.662   |
| Ejection fraction (%)                 | 59.7 $\pm$ 8.2              | 59.4 $\pm$ 7.7        | 59.4 $\pm$ 7.8        | 0.849   |
| eGFR, mL/min/1.73 meter squared       | 49.0 $\pm$ 18.5             | 58.2 $\pm$ 20.9       | 57.2 $\pm$ 20.8       | 0.012   |
| BMI, kg/m <sup>2</sup>                |                             |                       |                       |         |
| Mean $\pm$ SD                         | 33.3 $\pm$ 7.8              | 36.0 $\pm$ 8.4        | 35.7 $\pm$ 8.4        |         |
| Median (IQR)                          | 33.1 (27.8, 36.8)           | 34.8 (30.5, 41.4)     | 34.8 (30.2, 41.0)     | 0.083   |
| 6MWT distance, m (baseline)           | 200.0 $\pm$ 111.6           | 249.0 $\pm$ 113.8     | 244.4 $\pm$ 114.4     |         |
| Missing                               | 5                           | 0                     | 5                     | 0.025   |
| 6MWT distance, m (week-12)            | 142.1 $\pm$ 20.4            | 252.1 $\pm$ 119.3     | 251.4 $\pm$ 119.3     |         |
| Missing                               | 33                          | 0                     | 33                    | 0.194   |
| Loop diuretic dose > 40 mg/day, n (%) | 18 (51.4)                   | 93 (32.2)             | 111 (34.3)            | 0.023   |
| NYHA Class III, n (%)                 | 25 (71.4)                   | 112 (38.8)            | 137 (42.3)            | < 0.001 |
| NT-proBNP (pg/mL)                     |                             |                       |                       |         |
| Mean $\pm$ SD                         | 1405.5 $\pm$ 1180.4         | 1088.3 $\pm$ 1508.2   | 1122.6 $\pm$ 1478.0   |         |
| Median (IQR)                          | 1224.0 (543.0, 2073.0)      | 648.0 (352.0, 1195.0) | 671.0 (356.0, 1309.0) | 0.231   |
| KCCQ-OS                               |                             |                       |                       |         |
| Mean $\pm$ SD                         | 56.7 $\pm$ 18.3             | 63.4 $\pm$ 20.6       | 62.7 $\pm$ 20.4       |         |
| Median (IQR)                          | 59.7 (43.0, 68.8)           | 64.8 (49.0, 79.4)     | 63.8 (48.4, 78.1)     | 0.065   |

## Supplemental Figure

**Figure S1. Responder analysis (using 20 m) of effects of dapagliflozin (Dapa) on 6-minute walk test (6MWT) distance.**

**A**, Data are represented as proportion of patients experiencing 6MWT distance deterioration, no change, or improvement per treatment group. **B**, Likelihood of improvement  $\geq 20$  m vs deterioration  $\leq 20$  m on Dapa (vs placebo) after adjusting for baseline measurements including age, sex, race, history of diabetes, body mass index (BMI), left ventricular ejection fraction (LVEF), history, and type of atrial fibrillation (AF), Kansas City Cardiomyopathy Questionnaire (KCCQ), estimated glomerular filtration rate (eGFR), loop diuretic dose, New York Heart Association (NYHA) functional class, N-terminal pro B-type natriuretic peptide (NT-proBNP) and baseline 6MWT distance.

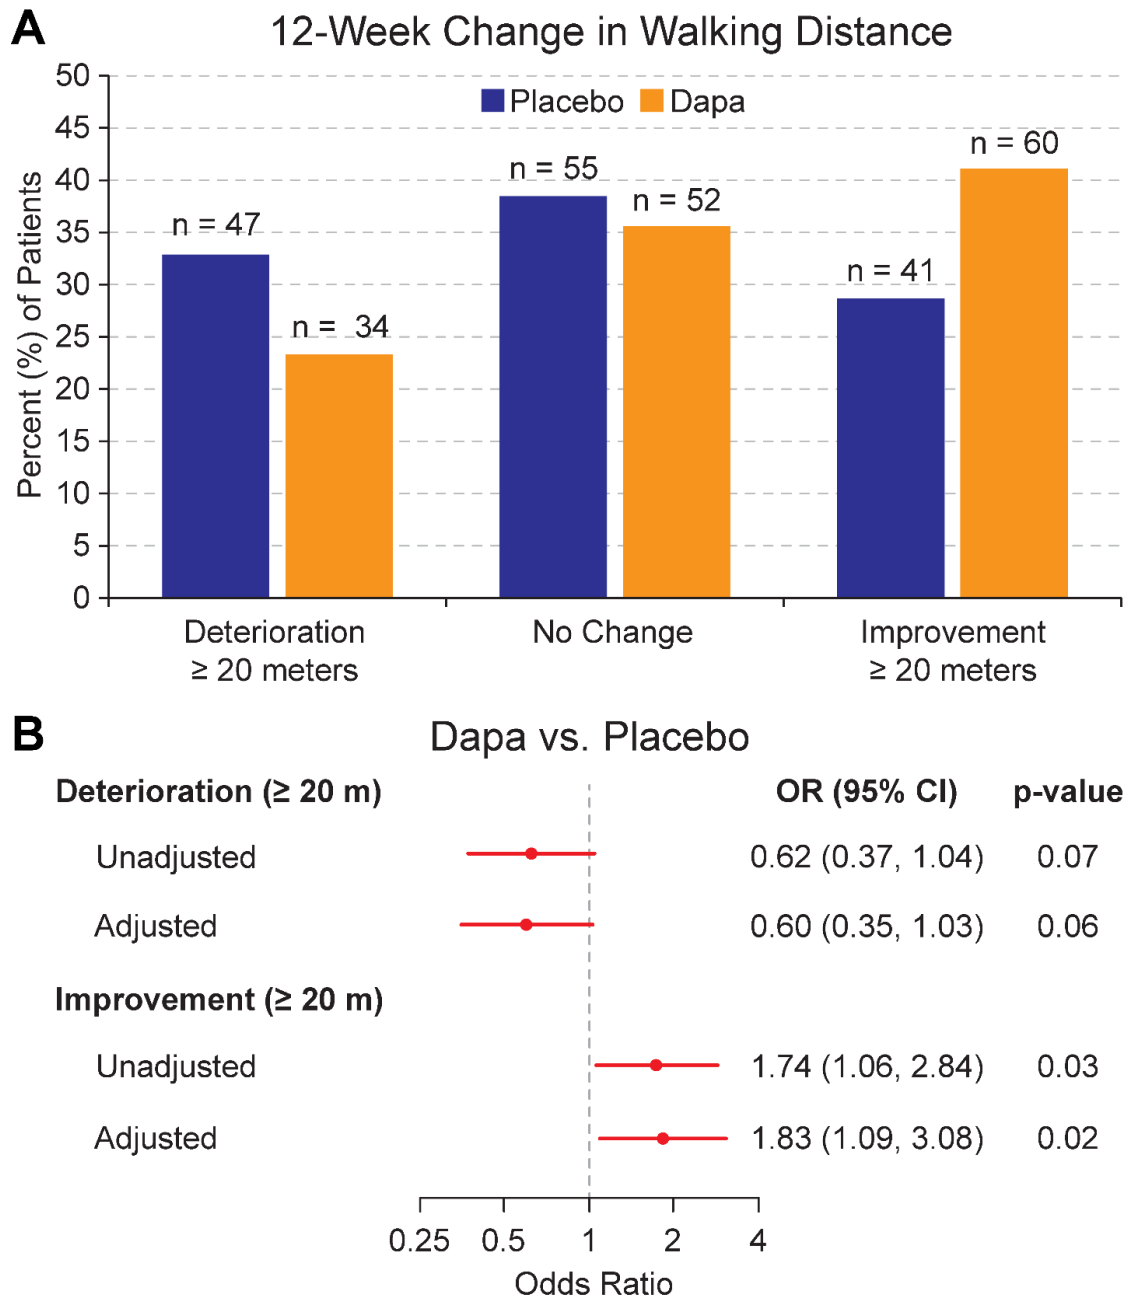

Supplement: hhf-16-e010633-s001.pdf [file hhf-16-e010633-s001.pdf]
